# Supplementary material for: Fully Biobased Epoxy Resins from Fatty Acids and Lignin
Source: MDPI journal article supplement (doi:10.3390/molecules25051158), 2020-03-05

# Fully biobased epoxy resins from fatty acids and lignin

*Pablo Ortiz*<sup>1,2,\*</sup>, *Richard Vendamme*<sup>1,2</sup> and *Walter Eevers*<sup>1,3</sup>

<sup>1</sup> Flemish Institute for Technological Research – VITO, Separation & Conversion Technology, Boeretang 200, 2400 Mol, Belgium. [pablo.ortiz@vito.be](mailto:pablo.ortiz@vito.be); [richard.vendamme@vito.be](mailto:richard.vendamme@vito.be); [walter.eevers@vito.be](mailto:walter.eevers@vito.be)

<sup>2</sup> Biorizon, Auvergnedijk 2, 4612 PZ Bergen op Zoom, The Netherlands.

<sup>3</sup> Department of Chemistry, University of Antwerp, Groenenborgerlaan 171, B-2020 Antwerpen, Belgium.



# Characterization of lignins

## NMR

### S1 Kraft lignoboost

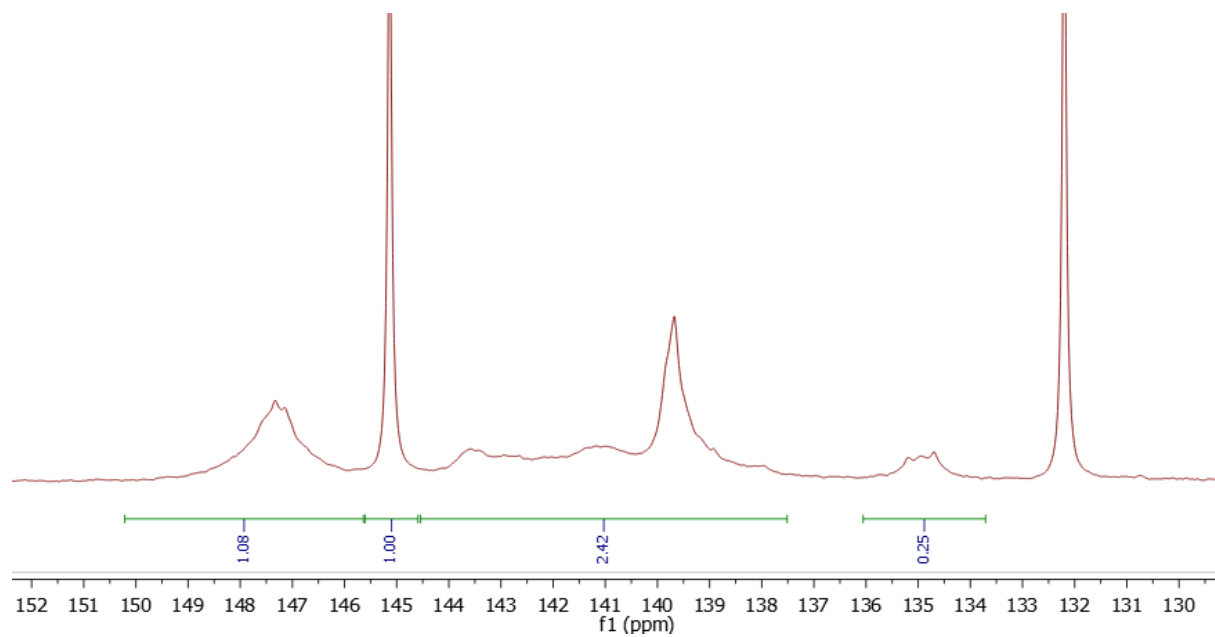

### S2 Acetone extracted Kraft

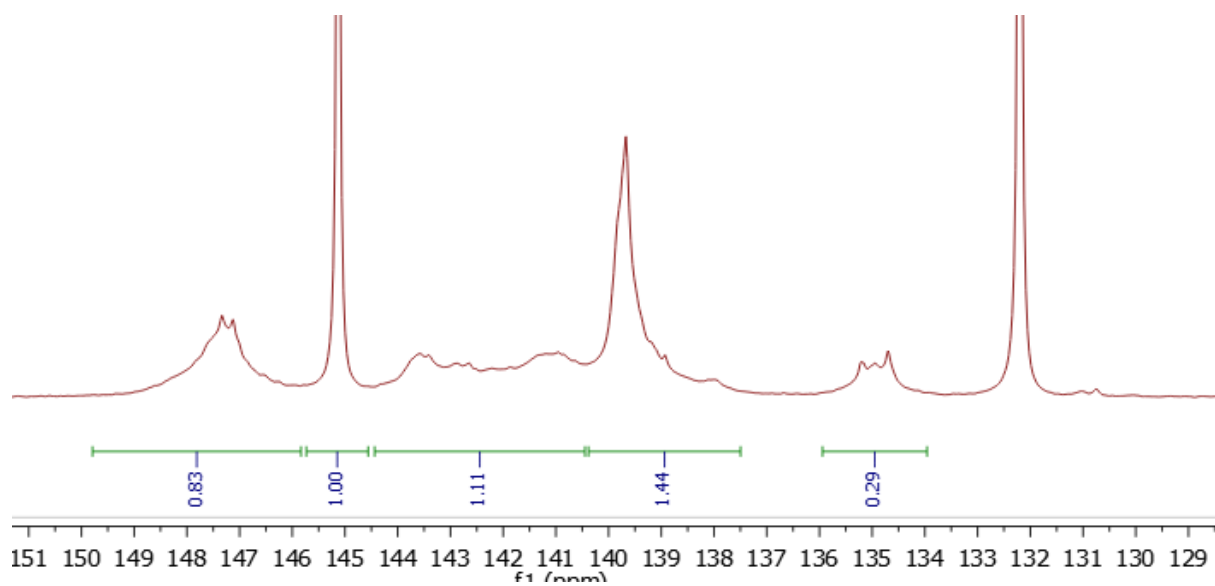



## S3 MeOH extracted Kraft

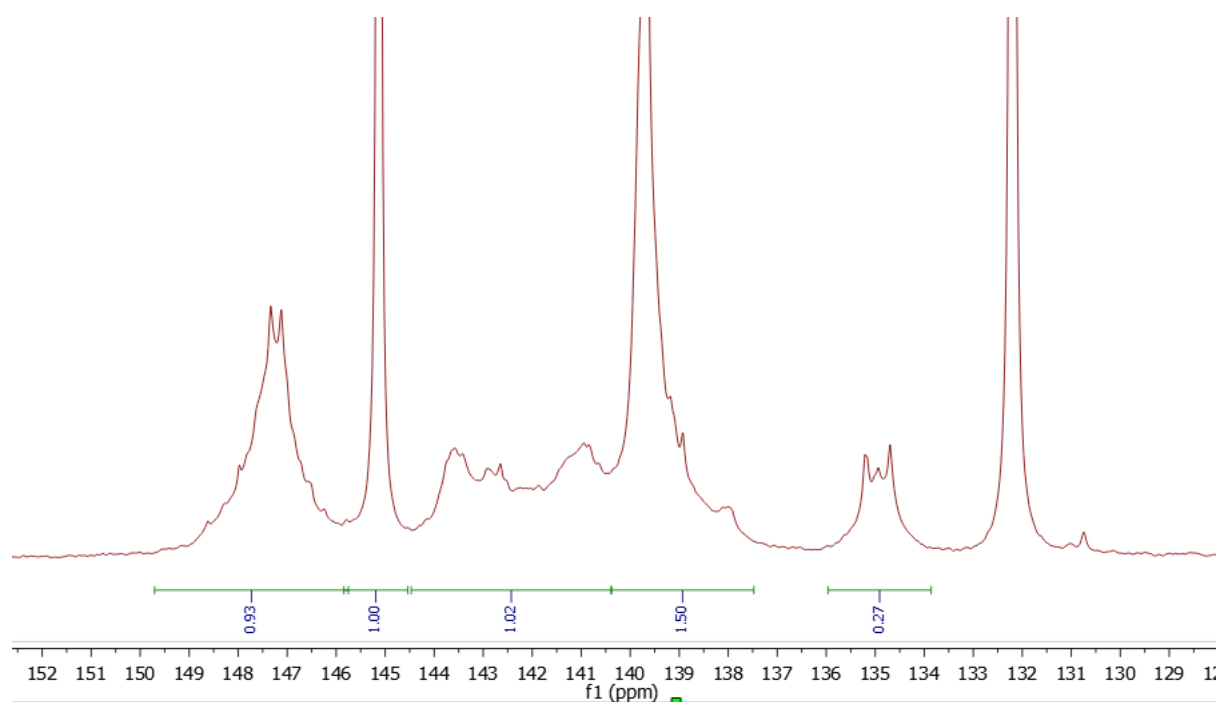

## GPC

### S4 Lignoboost KL

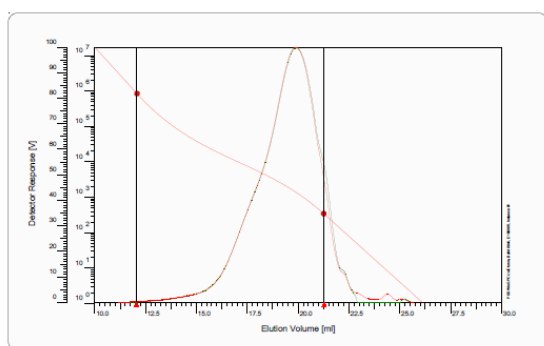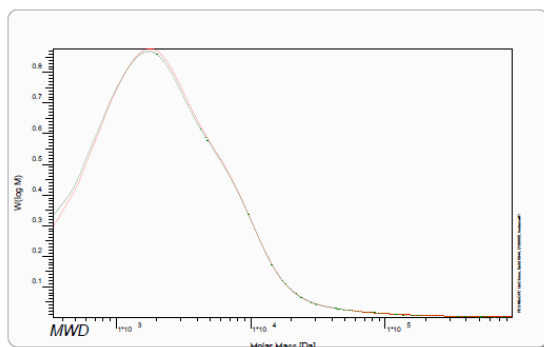

Operator: WinGPC01  
 Sample name: Vial 23: 190626-0164 KL - 1  
 Project file: C:\wingpc\_8#\1\GPC\1\BioHart.LDX  
 Calibration: CalibTHF20190626HR3-4.cal (created 28.6.2019, 08:01)

Inject date: Thursday, 27.06.2019 00:06:00  
 Concentration: 2,000 g/l  
 Baseline from: 11,165 ml to: 25,678 ml Integration from: 12,054 ml to: 21,276 ml  
 Int. Standard: --- at: 50,000 ml

Eluent: THF  
 Pump: LC-20AT  
 Injector: SIL-20AC  
 Interface: PSS/UDC 810 CH  
 Column 1: Styragel Guard Column  
 Column 2: Styragel HR1  
 Column 3: Styragel HR0.5  
 Detector 1: SPD-20A UV  
 Detector 2: RID-10A  
 Flowrate: 0,80 ml/min  
 Inj. Vol.: 100,00 µl  
 Delay: 0,000 ml  
 Delay: 0,130 ml

| Detector | 1          | 2       |
|----------|------------|---------|
| Name:    | SPD-20A UV | RID-10A |
| Mn [Da]: | 1.450      | 1.420   |
| Mw [Da]: | 5.370      | 5.200   |
| Mz [Da]: | 99.600     | 89.000  |
| Mv [Da]: |            |         |
| D:       | 3,713      | 3,662   |



## S5 Lignoboost KL – MeOH extracted

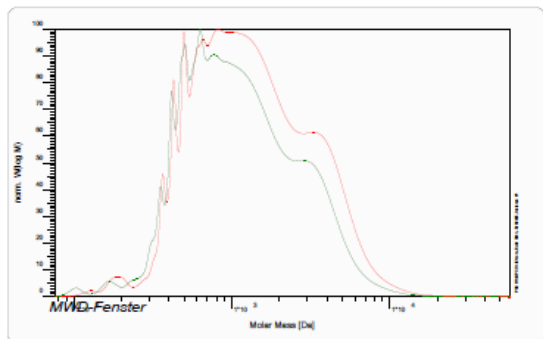

Eluent: THF  
 Pump: LC-20AT  
 Injector: SIL-20AC  
 Interface: PSS/UDC 810 CH  
 Column 1: Ultrahydrogel Guard Column  
 Column 2: Ultrahydrogel 500  
 Column 3: Ultrahydrogel 120  
 Detector 1: SPD-20A UV  
 Detector 2: RID-10A  
 Flowrate: 0,80 ml/min  
 Inj. Vol.: 25,00 µl  
 Delay: 0,000 ml  
 Delay: 0,000 ml

| Detector | 1          | 2       |
|----------|------------|---------|
| Name:    | SPD-20A UV | RID-10A |
| Mn [Da]: | 939        | 820     |
| Mw [Da]: | 1.880      | 1.610   |
| Mz [Da]: | 3.870      | 3.430   |
| Mv [Da]: |            |         |
| D:       | 2,004      | 1,959   |

## S6 Lignoboost KL – Acetone extracted

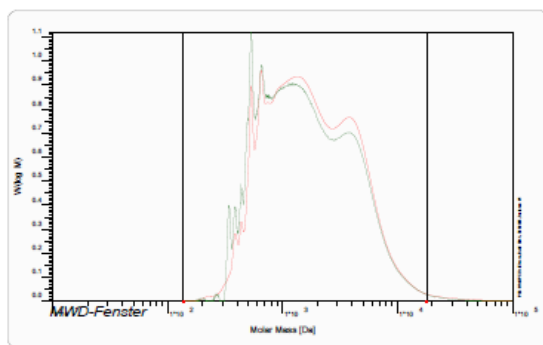

Eluent: THF  
 Pump: LC-20AT  
 Injector: SIL-20AC  
 Interface: Styragel Guard Column  
 Column 1: Styragel HR1  
 Column 2: Styragel HR0.5  
 Column 3: Styragel HR0.5  
 Detector 1: SPD-20A UV  
 Detector 2: RID-10A  
 Flowrate: 0,80 ml/min  
 Inj. Vol.: 100,00 µl  
 Delay: 0,000 ml  
 Delay: 0,110 ml

| Detector | 1          | 2       |
|----------|------------|---------|
| Name:    | SPD-20A UV | RID-10A |
| Mn [Da]: | 1.240      | 1.140   |
| Mw [Da]: | 2.740      | 2.540   |
| Mz [Da]: | 8.420      | 7.120   |
| Mv [Da]: |            |         |
| D:       | 2,206      | 2,216   |

## S11 West Fraser KL

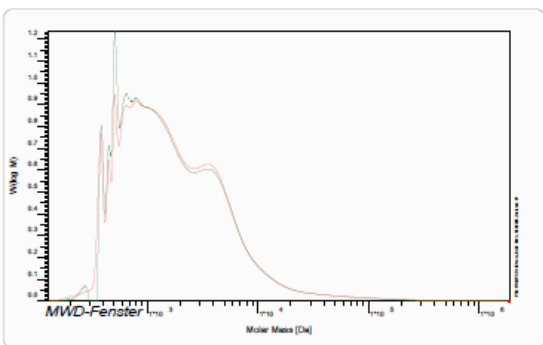

Eluent: THF  
 Pump: LC-20AT  
 Injector: SIL-20AC  
 Interface: PSS/UDC 810 CH  
 Column 1: Styragel Guard Column  
 Column 2: Styragel HR1  
 Column 3: Styragel HR0.5  
 Detector 1: SPD-20A UV  
 Detector 2: RID-10A  
 Flowrate: 0,80 ml/min  
 Inj. Vol.: 100,00 µl  
 Delay: 0,000 ml  
 Delay: 0,110 ml

| Detector | 1          | 2       |
|----------|------------|---------|
| Name:    | SPD-20A UV | RID-10A |
| Mn [Da]: | 1.090      | 1.090   |
| Mw [Da]: | 4.570      | 4.080   |
| Mz [Da]: | 94.800     | 69.800  |
| Mv [Da]: |            |         |
| D:       | 4,170      | 3,751   |



S12 BCD, solvent extracted eucalyptus lignin

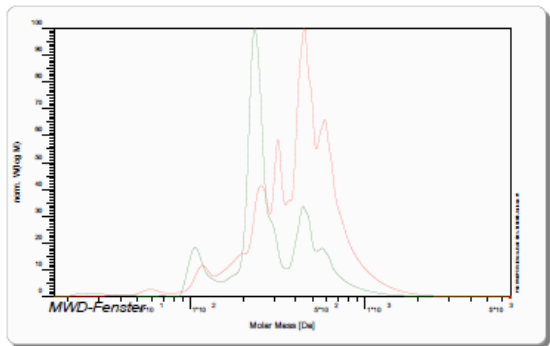

|             |                       |                       |
|-------------|-----------------------|-----------------------|
| Eluent:     | THF                   |                       |
| Pump:       | LC-20AT               | Flowrate: 0,80 ml/min |
| Injector:   | SIL-20AC              | Inj. Vol.: 40,00 µl   |
| Interface:  | PSS/UDC 810 CH        |                       |
| Column 1:   | Styragel Guard Column |                       |
| Column 2:   | Styragel HR1          |                       |
| Column 3:   | Styragel HR0.5        |                       |
| Detector 1: | SPD-20A UV            | Delay: 0,000 ml       |
| Detector 2: | RID-10A               | Delay: 0,000 ml       |

|          |            |         |
|----------|------------|---------|
| Detector | 1          | 2       |
| Name:    | SPD-20A UV | RID-10A |
| Mn [Da]: | 321        | 220     |
| Mw [Da]: | 466        | 327     |
| Mz [Da]: | 638        | 483     |
| Mv [Da]: |            |         |
| D:       | 1,451      | 1,485   |



# Curing mechanism

## S7 Proof of reaction of lignin with the epoxy groups of ELO<sub>me</sub> by DSC

0.5 grams of BCD Eucalyptus lignin oil was mixed with 0.5 grams of ELO<sub>me</sub> and stirred for 1 minute at room temperature. Then an aliquot of the mixture was placed in DSC pan and heated at 10°C/min to 120°C. It was maintained at that temperature for 60 min. Reference samples of the ELO<sub>me</sub> as well as Eucalyptus BCD lignin oil were run at the same conditions. Eucalyptus BCD lignin instead of Kraft lignin because it could be mixed with the ELO<sub>me</sub> without the need of solvents.

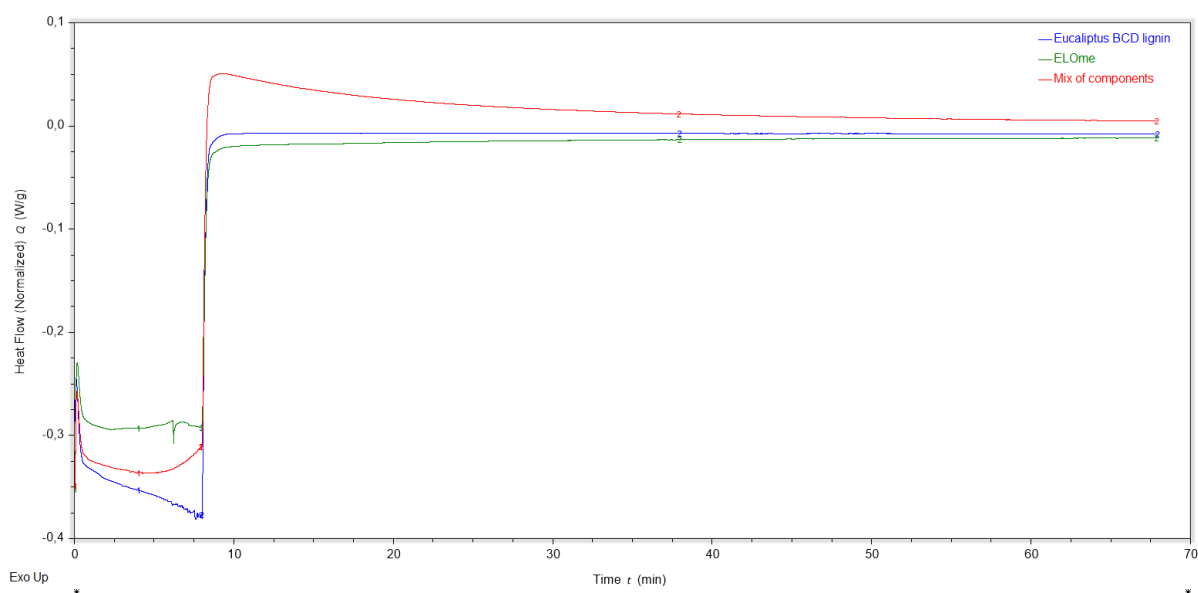



## S8 Proof of lignin incorporation in the resin by analyzing the leaching of a fully cured epoxy sample by $^1\text{H}$ NMR

150 mg of the fully cured epoxy resin with 22% of  $\text{KL}_{\text{MeOH}}$  was immersed in a vial containing 15 ml of THF and was kept there for 48h. The sample was removed, and the THF evaporated. The residue was analyzed by  $^1\text{H}$  NMR using  $\text{CDCl}_3$  as solvent.

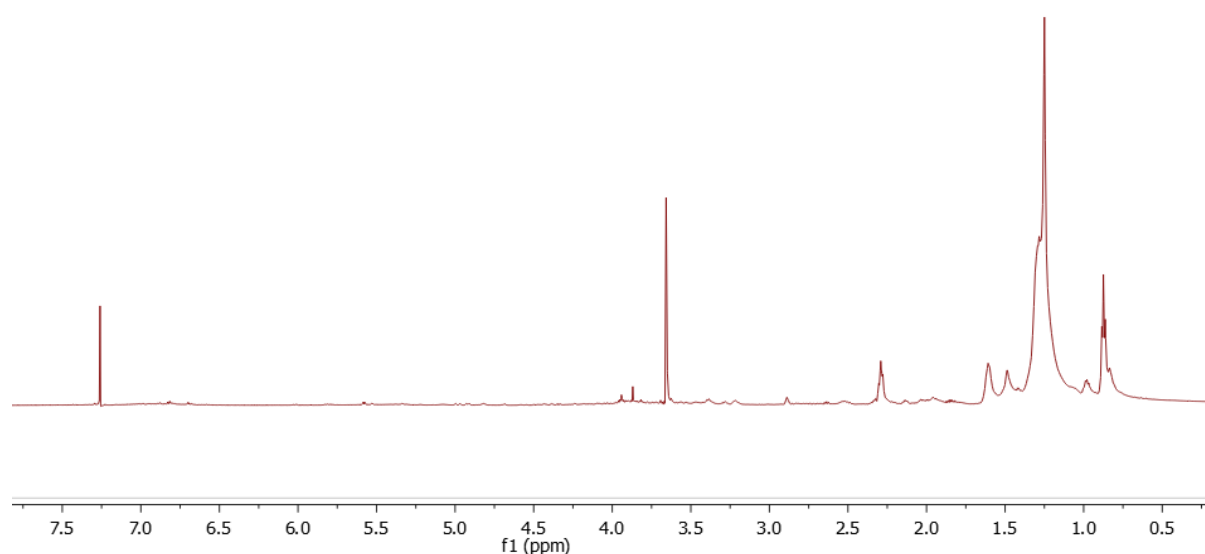



# Characterization of cured samples

S9 Plot of equivalents of diamine vs Young's modulus

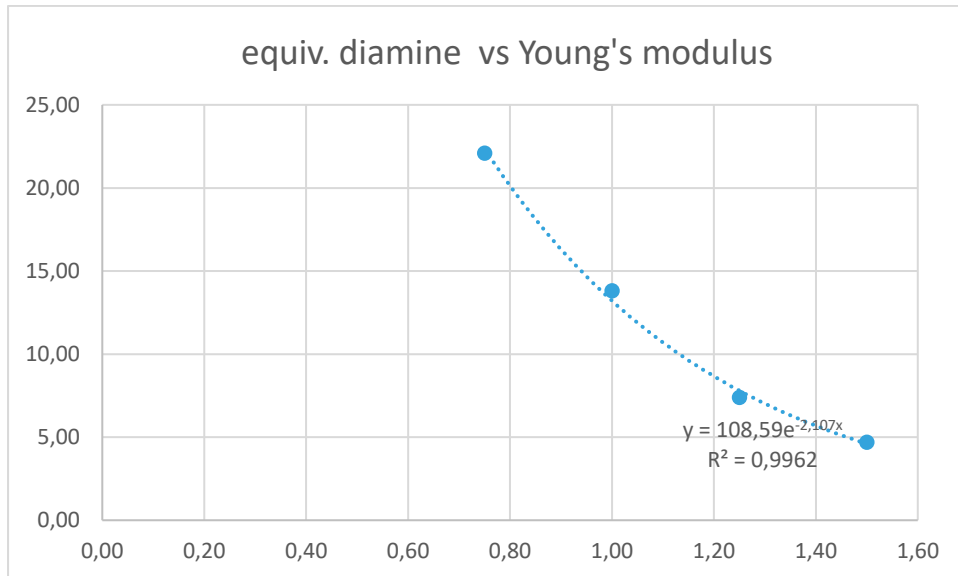

## DSC-2<sup>nd</sup> heating curves

S10 Variable amounts of Dimer diamine

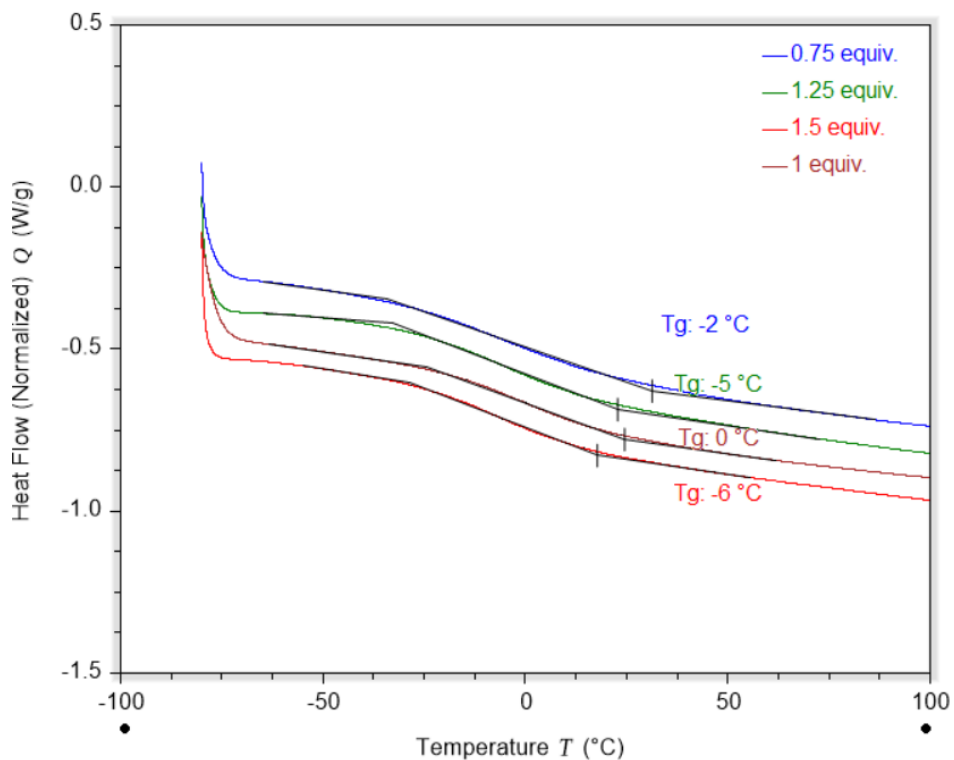



### S13 Different types of lignins

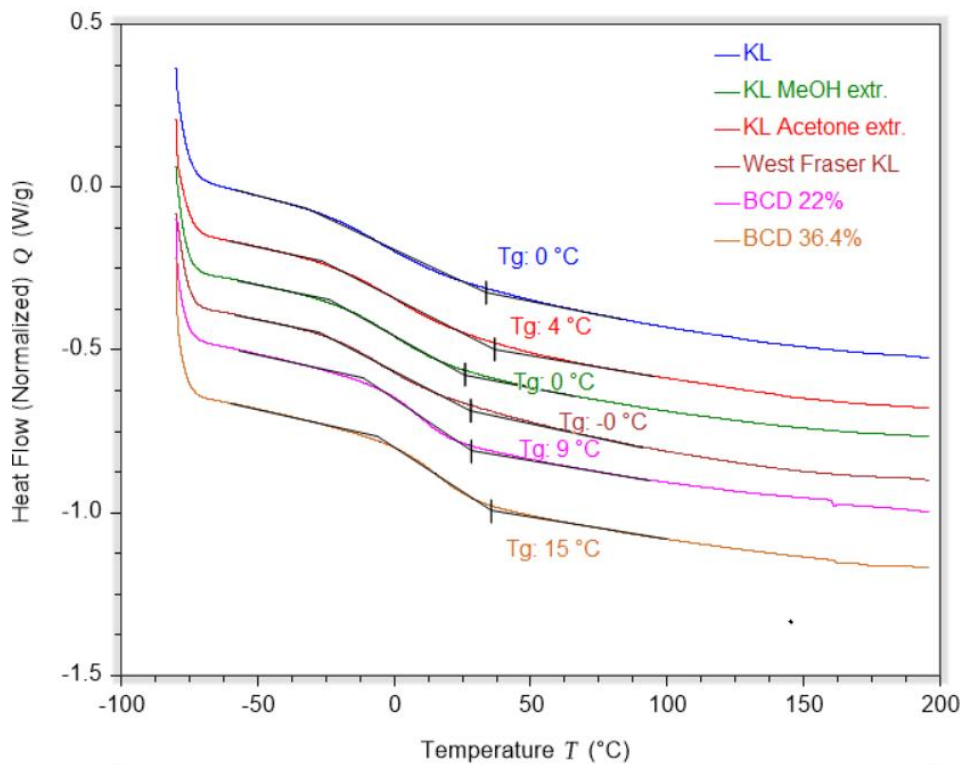

### S14 TGA

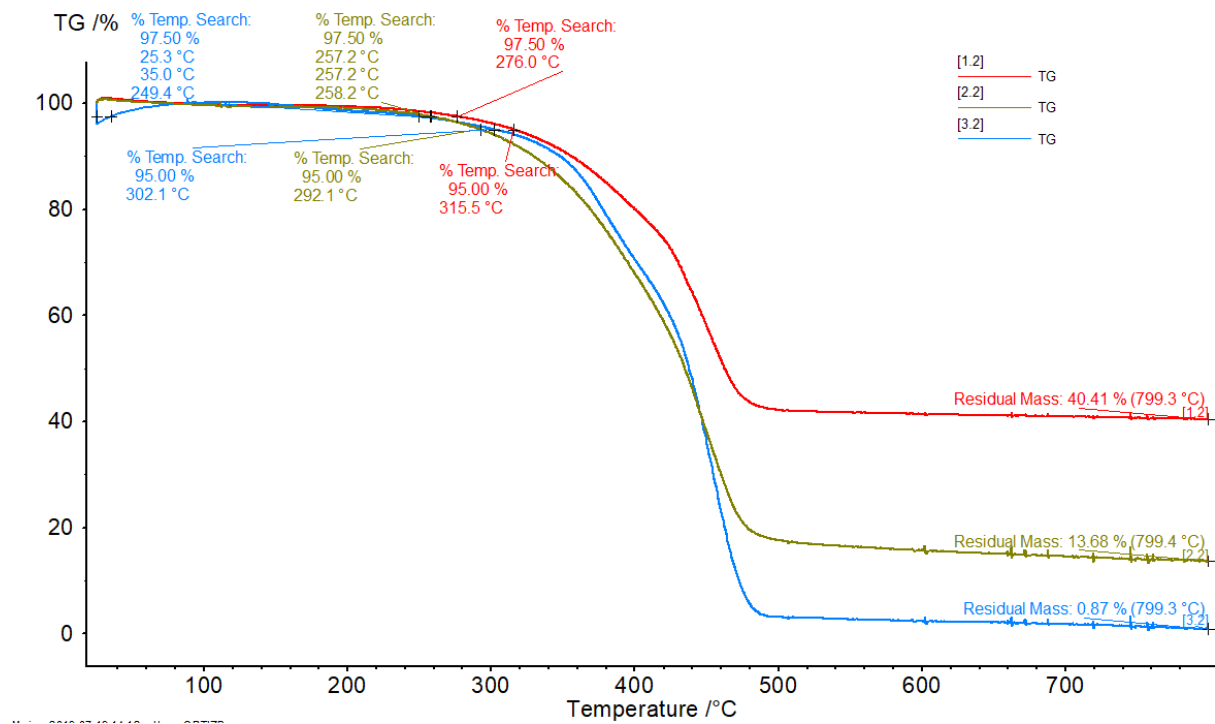

Supplement: s1 [file s1]
